# Supplementary material for: Forsythiaside stability in pretreated rat plasma and its pharmacokinetics after i.v. administration
Source: Royal Society of Chemistry journal article supplement (doi:10.1039/c4ay02653e), 2015-01-01
Supplement: c4ay02653e1.pdf [file c4ay02653e1.pdf]

Table 6. Forsythiaside stability studies examining the times and temperatures of plasma sample pretreatment processing (data are the means  $\pm$  SD, n=6).

| Condition                                                                          | Time (h) | Concentration (%) |                   |                    |                    |                    |
|------------------------------------------------------------------------------------|----------|-------------------|-------------------|--------------------|--------------------|--------------------|
|                                                                                    |          | high              | medium            | low                |                    |                    |
| Spiked plasma stored at 25°C and 0°C in an ice water vortexure for different times | 25°C     | 0                 | -                 | -                  | -                  |                    |
|                                                                                    |          | 0.5               | 100.04 $\pm$ 6.92 | 98.97 $\pm$ 12.66  | 97.95 $\pm$ 6.87   |                    |
|                                                                                    |          | 1                 | 87.72 $\pm$ 4.32  | 85.94 $\pm$ 3.28   | 87.72 $\pm$ 10.11  |                    |
|                                                                                    |          | 2                 | 82.95 $\pm$ 3.45  | 83.56 $\pm$ 10.72  | 82.37 $\pm$ 3.00   |                    |
|                                                                                    |          | 4                 | 60.49 $\pm$ 1.33  | 71.07 $\pm$ 7.40   | 75.10 $\pm$ 3.30   |                    |
|                                                                                    |          | 0°C               | 0                 | -                  | -                  | -                  |
|                                                                                    |          |                   | 0.5               | 103.03 $\pm$ 3.05  | 96.65 $\pm$ 3.96   | 103.78 $\pm$ 13.88 |
|                                                                                    |          |                   | 1                 | 103.88 $\pm$ 9.34  | 100.02 $\pm$ 3.45  | 100.86 $\pm$ 10.53 |
|                                                                                    |          |                   | 2                 | 95.59 $\pm$ 5.45   | 98.58 $\pm$ 8.47   | 95.84 $\pm$ 3.20   |
|                                                                                    |          |                   | 4                 | 94.01 $\pm$ 5.33   | 95.47 $\pm$ 9.55   | 96.65 $\pm$ 4.99   |
| Vortexed plasma samples stored at 25°C and -20°C for different times               | 25°C     | 0                 | -                 | -                  | -                  |                    |
|                                                                                    |          | 1                 | 95.38 $\pm$ 5.18  | 106.99 $\pm$ 4.18  | 95.61 $\pm$ 8.78   |                    |
|                                                                                    |          | 2                 | 97.12 $\pm$ 5.70  | 103.87 $\pm$ 3.15  | 102.42 $\pm$ 12.37 |                    |
|                                                                                    |          | 4                 | 85.13 $\pm$ 1.89  | 90.23 $\pm$ 4.76   | 90.59 $\pm$ 11.01  |                    |
|                                                                                    |          | -20°C             | 0                 | -                  | -                  | -                  |
|                                                                                    |          |                   | 1                 | 102.30 $\pm$ 8.93  | 104.25 $\pm$ 5.32  | 104.41 $\pm$ 7.54  |
|                                                                                    |          |                   | 2                 | 104.31 $\pm$ 10.18 | 99.53 $\pm$ 3.50   | 97.40 $\pm$ 10.01  |
|                                                                                    |          |                   | 4                 | 97.68 $\pm$ 6.99   | 95.27 $\pm$ 3.40   | 103.52 $\pm$ 12.26 |
| Treated plasma sample residues reconstituted after different times                 |          | 0                 | -                 | -                  | -                  |                    |
|                                                                                    |          | 1                 | 101.97 $\pm$ 5.64 | 99.44 $\pm$ 4.55   | 104.89 $\pm$ 12.00 |                    |
|                                                                                    |          | 24                | 97.85 $\pm$ 10.28 | 98.02 $\pm$ 3.17   | 95.82 $\pm$ 5.12   |                    |
| Supernatant injection times of the reconstituted samples                           |          | 0                 | -                 | -                  | -                  |                    |
|                                                                                    |          | 24                | 103.22 $\pm$ 4.71 | 98.88 $\pm$ 2.30   | 102.93 $\pm$ 7.81  |                    |
|                                                                                    |          | 60                | 97.13 $\pm$ 6.32  | 96.60 $\pm$ 5.15   | 104.37 $\pm$ 3.37  |                    |

Table 7. Forsythiaside stability studies examining the temperatures of plasma sample pretreatment processing (data are the means  $\pm$  SD, n=6).

| Condition           | Temperature<br>(°C) | Concentration (%) |             |             |
|---------------------|---------------------|-------------------|-------------|-------------|
|                     |                     | high              | medium      | low         |
| Vortexed samples    | 25                  | -                 | -           | -           |
| centrifuged at 4°C  | 4                   | 97.51 $\pm$       | 98.83 $\pm$ | 96.48 $\pm$ |
| and 25°C            |                     | 4.61              | 3.65        | 5.54        |
| Centrifuged samples | 25                  | -                 | -           | -           |
| evaporated to       | 37                  | 84.20 $\pm$       | 91.61 $\pm$ | 88.58 $\pm$ |
| dryness at 25°C and |                     | 8.93              | 3.03        | 10.86       |
| 37°C                |                     |                   |             |             |
